# Supplementary material for: Climatological distribution of dissolved inorganic nutrients in the western Mediterranean Sea (1981–2017)
Source: Copernicus journal article supplement (doi:10.5194/essd-13-5915-2021), 2021-12-22
Supplement: Supplementary file [file essd-13-5915-2021-supplement-title-page.pdf › essd-13-5915-2021-supplement-title-page.pdf]

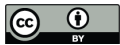

## *Supplement of*

# **Climatological distribution of dissolved inorganic nutrients in the western Mediterranean Sea (1981–2017)**

**Malek Belgacem et al.**

*Correspondence to:* Malek Belgacem (malek.belgacem@ve.ismar.cnr.it)

- [essd-13-5915-2021-supplement-title-page.pdf](#)
- [ESSD3vrev\\_clima\\_paper\\_final\\_vf1\\_pdf\\_with track.pdf](#)
- [clima\\_paper\\_nutrient\\_animation-1981-2017](#)
  - [Nitrate\\_L1\\_81\\_17.gif](#)
  - [Phosphate\\_L1\\_81\\_17.gif](#)
  - [silicate\\_L1\\_81\\_17.gif](#)

The copyright of individual parts of the supplement might differ from the article licence.
